# Supplementary material for: Muscle-Strengthening Exercise Questionnaire (MSEQ): an assessment of concurrent validity and test–retest reliability
Source: PubMed Central journal article supplement — BMJ Open Sport Exerc Med. 2022 Feb 14;8(1):e001225. doi: 10.1136/bmjsem-2021-001225 (PMC8845318; doi:10.1136/bmjsem-2021-001225), 2022-02-14
Supplement: bmjsem-2021-001225supp003.pdf [file bmjsem-2021-001225supp003.pdf]

Supplemental Digital Content 3.

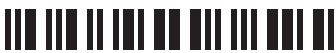

About you

The first set of questions will provide us with some basic information about you.

1. What was your age at your last birthday?

Please enter only whole numbers.

2. What was your sex at birth?

Female

☐

Male

☐

3. Which country do you usually live in?

Afghanistan

☐

Albania

☐

Algeria

☐

Andorra

☐

Angola

☐

Antigua and Barbuda

☐

Argentina

☐

Armenia

☐

Australia

☐

Austria

☐

Azerbaijan

☐

Bahamas

☐

Bahrain

☐

Bangladesh

☐

Barbados

☐

Belarus

☐

Belgium

☐

Belize

☐

Benin

☐

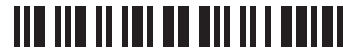

|                                  |                          |
|----------------------------------|--------------------------|
| Bhutan                           | <input type="checkbox"/> |
| Bolivia                          | <input type="checkbox"/> |
| Bosnia and Herzegovina           | <input type="checkbox"/> |
| Botswana                         | <input type="checkbox"/> |
| Brazil                           | <input type="checkbox"/> |
| Brunei                           | <input type="checkbox"/> |
| Bulgaria                         | <input type="checkbox"/> |
| Burkina Faso                     | <input type="checkbox"/> |
| Burundi                          | <input type="checkbox"/> |
| Côte d'Ivoire                    | <input type="checkbox"/> |
| Cabo Verde                       | <input type="checkbox"/> |
| Cambodia                         | <input type="checkbox"/> |
| Cameroon                         | <input type="checkbox"/> |
| Canada                           | <input type="checkbox"/> |
| Central African Republic         | <input type="checkbox"/> |
| Chad                             | <input type="checkbox"/> |
| Chile                            | <input type="checkbox"/> |
| China                            | <input type="checkbox"/> |
| Colombia                         | <input type="checkbox"/> |
| Comoros                          | <input type="checkbox"/> |
| Congo (Congo-Brazzaville)        | <input type="checkbox"/> |
| Costa Rica                       | <input type="checkbox"/> |
| Croatia                          | <input type="checkbox"/> |
| Cuba                             | <input type="checkbox"/> |
| Cyprus                           | <input type="checkbox"/> |
| Czechia (Czech Republic)         | <input type="checkbox"/> |
| Democratic Republic of the Congo | <input type="checkbox"/> |
| Denmark                          | <input type="checkbox"/> |
| Djibouti                         | <input type="checkbox"/> |

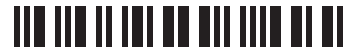

|                             |  |
|-----------------------------|--|
| Dominica                    |  |
| Dominican Republic          |  |
| Ecuador                     |  |
| Egypt                       |  |
| El Salvador                 |  |
| Equatorial Guinea           |  |
| Eritrea                     |  |
| Estonia                     |  |
| Eswatini (fmr. "Swaziland") |  |
| Ethiopia                    |  |
| Fiji                        |  |
| Finland                     |  |
| France                      |  |
| Gabon                       |  |
| Gambia                      |  |
| Georgia                     |  |
| Germany                     |  |
| Ghana                       |  |
| Greece                      |  |
| Grenada                     |  |
| Guatemala                   |  |
| Guinea                      |  |
| Guinea-Bissau               |  |
| Guyana                      |  |
| Haiti                       |  |
| Holy See                    |  |
| Honduras                    |  |
| Hungary                     |  |
| Iceland                     |  |

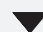

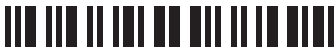

|  |               |                          |
|--|---------------|--------------------------|
|  | India         | <input type="checkbox"/> |
|  | Indonesia     | <input type="checkbox"/> |
|  | Iran          | <input type="checkbox"/> |
|  | Iraq          | <input type="checkbox"/> |
|  | Ireland       | <input type="checkbox"/> |
|  | Israel        | <input type="checkbox"/> |
|  | Italy         | <input type="checkbox"/> |
|  | Jamaica       | <input type="checkbox"/> |
|  | Japan         | <input type="checkbox"/> |
|  | Jordan        | <input type="checkbox"/> |
|  | Kazakhstan    | <input type="checkbox"/> |
|  | Kenya         | <input type="checkbox"/> |
|  | Kiribati      | <input type="checkbox"/> |
|  | Kuwait        | <input type="checkbox"/> |
|  | Kyrgyzstan    | <input type="checkbox"/> |
|  | Laos          | <input type="checkbox"/> |
|  | Latvia        | <input type="checkbox"/> |
|  | Lebanon       | <input type="checkbox"/> |
|  | Lesotho       | <input type="checkbox"/> |
|  | Liberia       | <input type="checkbox"/> |
|  | Libya         | <input type="checkbox"/> |
|  | Liechtenstein | <input type="checkbox"/> |
|  | Lithuania     | <input type="checkbox"/> |
|  | Luxembourg    | <input type="checkbox"/> |
|  | Madagascar    | <input type="checkbox"/> |
|  | Malawi        | <input type="checkbox"/> |
|  | Malaysia      | <input type="checkbox"/> |
|  | Maldives      | <input type="checkbox"/> |
|  | Mali          | <input type="checkbox"/> |
|  |               | ▼                        |

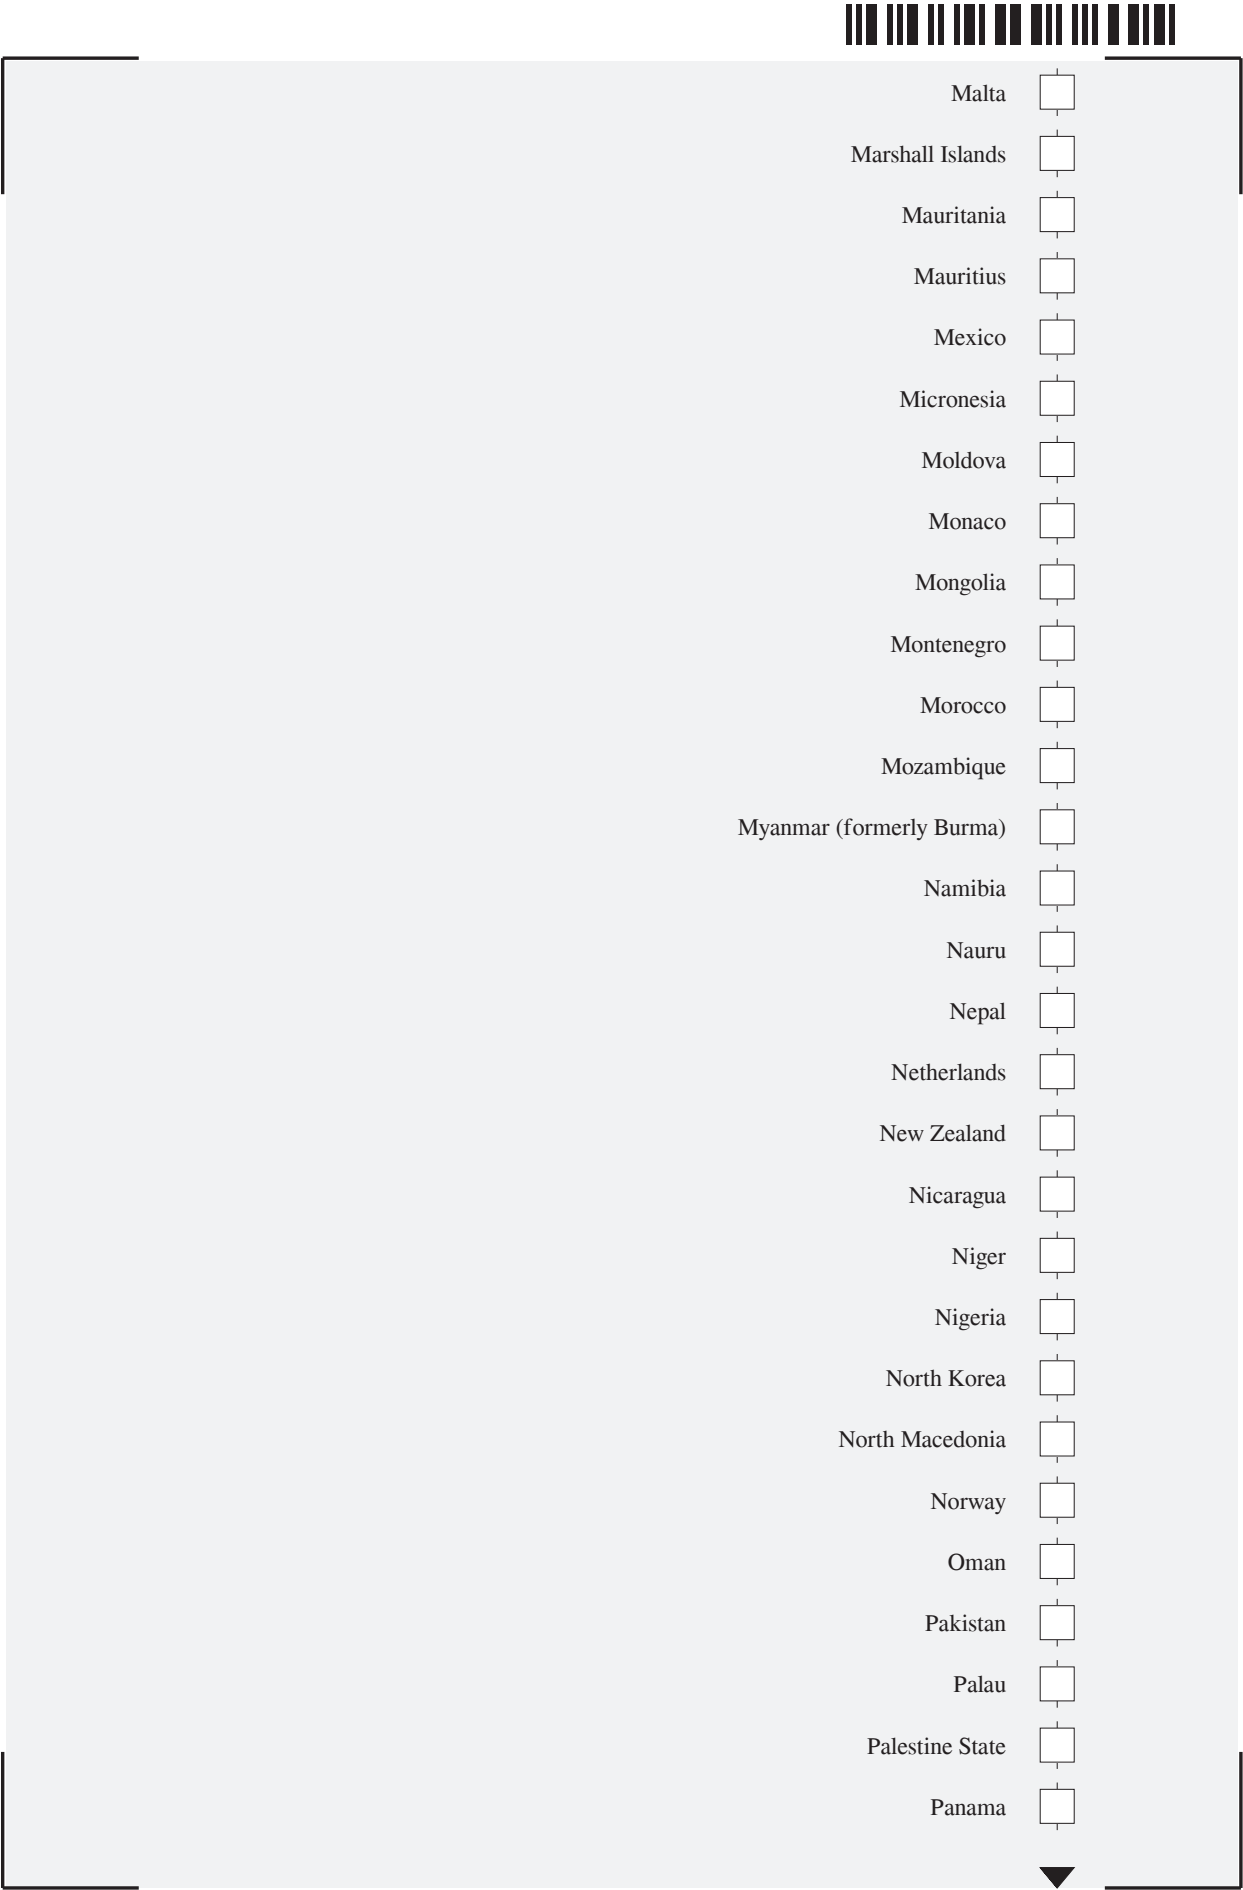

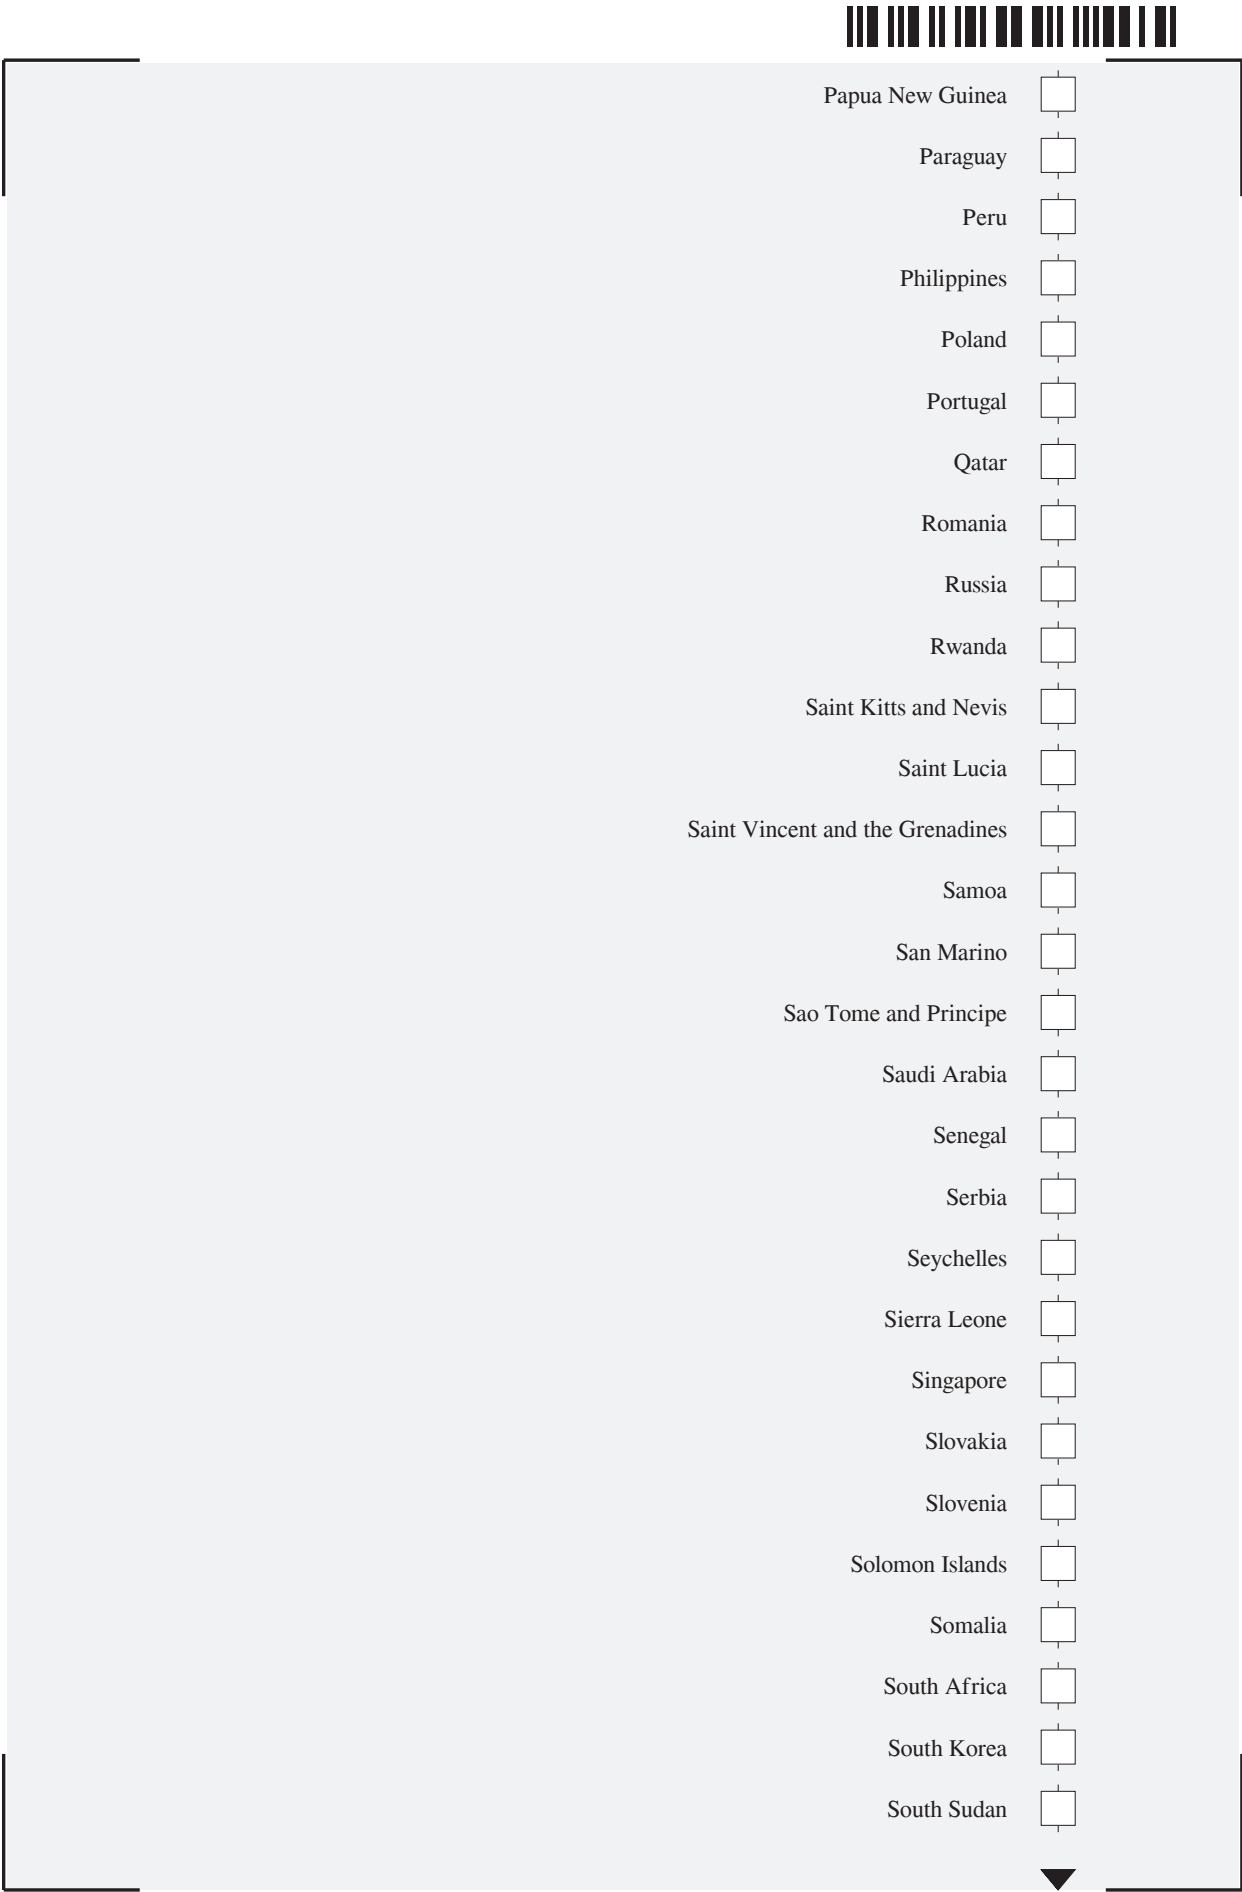

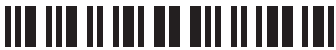

|  |                          |                          |
|--|--------------------------|--------------------------|
|  | Spain                    | <input type="checkbox"/> |
|  | Sri Lanka                | <input type="checkbox"/> |
|  | Sudan                    | <input type="checkbox"/> |
|  | Suriname                 | <input type="checkbox"/> |
|  | Sweden                   | <input type="checkbox"/> |
|  | Switzerland              | <input type="checkbox"/> |
|  | Syria                    | <input type="checkbox"/> |
|  | Tajikistan               | <input type="checkbox"/> |
|  | Tanzania                 | <input type="checkbox"/> |
|  | Thailand                 | <input type="checkbox"/> |
|  | Timor-Leste              | <input type="checkbox"/> |
|  | Togo                     | <input type="checkbox"/> |
|  | Tonga                    | <input type="checkbox"/> |
|  | Trinidad and Tobago      | <input type="checkbox"/> |
|  | Tunisia                  | <input type="checkbox"/> |
|  | Turkey                   | <input type="checkbox"/> |
|  | Turkmenistan             | <input type="checkbox"/> |
|  | Tuvalu                   | <input type="checkbox"/> |
|  | Uganda                   | <input type="checkbox"/> |
|  | Ukraine                  | <input type="checkbox"/> |
|  | United Arab Emirates     | <input type="checkbox"/> |
|  | United Kingdom           | <input type="checkbox"/> |
|  | United States of America | <input type="checkbox"/> |
|  | Uruguay                  | <input type="checkbox"/> |
|  | Uzbekistan               | <input type="checkbox"/> |
|  | Vanuatu                  | <input type="checkbox"/> |
|  | Venezuela                | <input type="checkbox"/> |
|  | Vietnam                  | <input type="checkbox"/> |
|  | Yemen                    | <input type="checkbox"/> |
|  |                          | ▼                        |

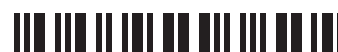

Zambia

☐

Zimbabwe

☐**4. What best describes the region you live in?**

Urban - capital cities or metropolitan centres with a population of &gt;100,000

☐

Regional - large rural centres with a population between 5,000-99,000

☐

Remote - remote centres with a population of &lt;5,000

☐**5. Which of the following descriptions best applies to your usual 'work' situation?**

Going to school or university full-time

☐

In paid employment or self-employed

☐

Doing unpaid work for a business that you own, or that a relative owns

☐

Permanently unable to work because of long-term sickness or disability

☐

Retired from paid work

☐

Looking after home or family

☐

Other

☐

Other

**6. What is your highest level of education completed?**

Never attended school

☐

Primary school

☐

Some high school

☐

Year 12 or equivalent

☐

Technical or trade school certificate/apprenticeship

☐

University or tertiary qualification (Undergraduate)

☐

University or tertiary qualification (Postgraduate/Masters/Doctorate)

☐

Other

☐

Other

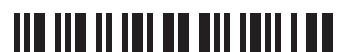**7. What is your marital status?**

- Married ☐
- Defacto ☐
- Separated / Divorced ☐
- Widowed ☐
- Never married ☐

**The next questions are about your own health behaviours.**

In this section, we ask questions about your health and health behaviours to get an idea of your health and lifestyle.

**8. About how tall are you, without shoes, in centimetres (cm) or feet (ft) and inches (in)?**

in centimetres (cm)

Comment

in feet (ft) and inches (in)

Comment

**9. About how much do you weigh, without shoes and heavy clothes, in kilograms (kg) or pounds (lb) and ounces (oz)?**

in kilograms (kg)

Comment

in pounds (lb) and ounces (oz)

Comment

**10. How would you rate your general health?**

- Excellent ☐
- Very good ☐
- Good ☐
- Fair ☐
- Poor ☐
