# Supplementary material for: Muscle-Strengthening Exercise Questionnaire (MSEQ): an assessment of concurrent validity and test–retest reliability
Source: PubMed Central journal article supplement — BMJ Open Sport Exerc Med. 2022 Feb 14;8(1):e001225. doi: 10.1136/bmjsem-2021-001225 (PMC8845318; doi:10.1136/bmjsem-2021-001225), 2022-02-14
Supplement: bmjsem-2021-001225supp004.pdf [file bmjsem-2021-001225supp004.pdf]

**Table. Supplemental Digital Content 3:** Interclass correlations coefficient (ICC), Spearman's rank correlation ( $\rho$ ), Kappa statistics ( $\kappa$ ), and 95% confidence interval (95% CI) for test-retest reliability <sup>a</sup>, and concurrent validity <sup>b</sup> of the Muscle-Strengthening Exercise Questionnaire (MSEQ)-Short items.

| MSEQ-Short items (All types of MSE combined) | Test-retest reliability <sup>a</sup> |                  |                   |             | Concurrent validity <sup>b</sup> |                  |
|----------------------------------------------|--------------------------------------|------------------|-------------------|-------------|----------------------------------|------------------|
|                                              | ICC (95%CI)                          | $\rho$ (95% CI)  | $\kappa$ (95% CI) | % Agreement | ICC (95%CI)                      | $\rho$ (95% CI)  |
| Days per week (usual week)                   | 0.58 (0.40-0.73)                     | 0.91 (0.85-0.95) | –                 | –           | 0.56 (0.37-0.71)                 | 0.58 (0.35-0.76) |
| Duration (minutes/per day)                   | 0.69 (0.55-0.80)                     | 0.89 (0.78-0.95) | –                 | –           | 0.46 (0.24-0.64)                 | 0.73 (0.59-0.83) |
| Level of intensity <sup>c</sup>              | 0.51 (0.31-0.68)                     | 0.82 (0.66-0.92) | –                 | –           | 0.18 (-0.06-0.42)                | 0.45 (0.18-0.67) |
| Muscle groups targeted                       |                                      |                  |                   |             |                                  |                  |
| Legs                                         | –                                    | –                | 0.41 (0.22-0.58)  | 79.6        | –                                | –                |
| Hips                                         | –                                    | –                | 0.51 (0.34-0.66)  | 79.6        | –                                | –                |
| Back                                         | –                                    | –                | 0.45 (0.26-0.63)  | 81.5        | –                                | –                |
| Abdomen                                      | –                                    | –                | 0.35 (0.17-0.52)  | 77.8        | –                                | –                |
| Chest                                        | –                                    | –                | 0.41 (0.22-0.59)  | 77.8        | –                                | –                |
| Shoulders                                    | –                                    | –                | 0.44 (0.24-0.60)  | 83.3        | –                                | –                |
| Arms                                         | –                                    | –                | 0.47 (0.29-0.64)  | 77.8        | –                                | –                |

<sup>a</sup> Test and retest of MSEQ was conducted a maximum of 14 days apart.

<sup>b</sup> To assess the concurrent validity, respondents completed the MSE 7-day log for 7 consecutive days a maximum of 14 days after the first administration.

<sup>c</sup> To assess level of intensity, using the previously validated OMNI-Resistance Exercise Scale (Robertson et al., 2003), respondents was asked to report for each type of muscle-strengthening exercise “on a scale of 0-10 please indicate how hard you feel you exercise when you are doing ... with 0 representing “extremely easy” and 10 representing “extremely hard”.

<sup>d</sup> To assess muscle groups used, respondents were asked when they undertake muscle-strengthening exercise, do they do exercise that target the following muscle groups legs, hips, back, abdomen, chest, shoulders, and arms.

<sup>e</sup> Weight machines defined as using weight machines such as leg press, chest press, lat pulldown.

<sup>f</sup> Body weight exercises defined as doing push-ups, sit-ups.

<sup>g</sup> Resistance exercises defined as using resistance bands or free weights like dumbbells.

<sup>h</sup> Holistic exercises defined as doing Yoga, Tai-Chi and Pilates.

– results not applicable for this variable.
