# Supplementary material for: Muscle-Strengthening Exercise Questionnaire (MSEQ): an assessment of concurrent validity and test–retest reliability
Source: HighWire-hosted journal article supplement (doi:10.1136/bmjsem-2021-001225), 2022-02-01
Supplement: bmjsem-2021-001225supp005_data_supplement.pdf [file bmjsem-2021-001225supp005_data_supplement.pdf]

**Table. Supplemental Digital Content 4:** Interclass correlations coefficient (ICC), Spearman's rank correlation ( $\rho$ ), Kappa statistics ( $\kappa$ ), and 95% confidence interval (95% CI) for test-retest reliability <sup>a</sup>, and concurrent validity <sup>b</sup> of the Muscle-Strengthening Exercise Questionnaire (MSEQ)-Long items.

| MSEQ-Long items (4 types of MSE assessed separately) | Test-retest reliability <sup>a</sup> |                  |                   |             | Concurrent validity <sup>b</sup> |                  |
|------------------------------------------------------|--------------------------------------|------------------|-------------------|-------------|----------------------------------|------------------|
|                                                      | ICC (95%CI)                          | $\rho$ (95% CI)  | $\kappa$ (95% CI) | % Agreement | ICC (95%CI)                      | $\rho$ (95% CI)  |
| <i>Days per week (usual week)</i>                    |                                      |                  |                   |             |                                  |                  |
| Use weight machines <sup>e</sup>                     | 0.85 (0.74-0.91)                     | 0.79 (0.60-0.94) | —                 | —           | 0.69 (0.16-0.86)                 | 0.76 (0.59-0.89) |
| Body weight exercises <sup>f</sup>                   | 0.93 (0.88-0.96)                     | 0.86 (0.73-0.93) | —                 | —           | 0.74 (0.56-0.85)                 | 0.59 (0.36-0.76) |
| Use resistance bands or free weights <sup>g</sup>    | 0.95 (0.92-0.97)                     | 0.87 (0.73-0.95) | —                 | —           | 0.72 (0.35-0.86)                 | 0.64 (0.38-0.84) |
| Holistic exercises <sup>h</sup>                      | 0.95 (0.91-0.97)                     | 0.83 (0.65-0.95) | —                 | —           | 0.78 (0.45-0.89)                 | 0.77 (0.60-0.89) |
| <i>Duration (minutes/per day)</i>                    |                                      |                  |                   |             |                                  |                  |
| Use weight machines <sup>e</sup>                     | 0.90 (0.82-0.94)                     | 0.82 (0.67-0.93) | —                 | —           | 0.60 (0.18-0.79)                 | 0.73 (0.56-0.87) |
| Body weight exercises <sup>f</sup>                   | 0.88 (0.79-0.93)                     | 0.77 (0.60-0.87) | —                 | —           | 0.39 (-0.04-0.64)                | 0.34 (0.08-0.56) |
| Use resistance bands or free weights <sup>g</sup>    | 0.89 (0.82-0.94)                     | 0.79 (0.62-0.90) | —                 | —           | 0.78 (0.37-0.90)                 | 0.74 (0.55-0.86) |
| Holistic exercises <sup>h</sup>                      | 0.96 (0.94-0.98)                     | 0.88 (0.74-0.96) | —                 | —           | 0.70 (0.38-0.84)                 | 0.73 (0.54-0.87) |
| <i>Level of intensity <sup>c</sup></i>               |                                      |                  |                   |             |                                  |                  |
| Use weight machines <sup>e</sup>                     | 0.90 (0.83-0.94)                     | 0.82 (0.66-0.95) | —                 | —           | 0.73 (0.38-0.87)                 | 0.71 (0.52-0.85) |
| Body weight exercises <sup>f</sup>                   | 0.93 (0.89-0.96)                     | 0.78 (0.61-0.90) | —                 | —           | 0.35 (-0.07-0.61)                | 0.30 (0.03-0.55) |
| Use resistance bands or free weights <sup>g</sup>    | 0.93 (0.88-0.96)                     | 0.76 (0.59-0.88) | —                 | —           | 0.78 (0.21-0.91)                 | 0.68 (0.52-0.82) |
| Holistic exercises <sup>h</sup>                      | 0.89 (0.82-0.94)                     | 0.81 (0.63-0.94) | —                 | —           | 0.69 (0.43-0.83)                 | 0.63 (0.41-0.78) |
| <i>Muscle groups used <sup>d</sup></i>               |                                      |                  |                   |             |                                  |                  |
| Use weight machines <sup>e</sup>                     |                                      |                  |                   |             |                                  |                  |
| Legs                                                 | —                                    | —                | 0.70 (0.49-0.88)  | 85.2        | —                                | —                |
| Hips                                                 | —                                    | —                | 0.61 (0.34-0.85)  | 87.0        | —                                | —                |
| Back                                                 | —                                    | —                | 0.74 (0.54-0.89)  | 87.0        | —                                | —                |
| Abdomen                                              | —                                    | —                | 0.33 (-0.01-0.65) | 81.5        | —                                | —                |
| Chest                                                | —                                    | —                | 0.78 (0.59-0.93)  | 88.9        | —                                | —                |
| Shoulders                                            | —                                    | —                | 0.85 (0.67-0.96)  | 92.6        | —                                | —                |
| Arms                                                 | —                                    | —                | 0.81 (0.63-0.96)  | 90.7        | —                                | —                |
| Body weight exercises <sup>f</sup>                   |                                      |                  |                   |             |                                  |                  |
| Legs                                                 | —                                    | —                | 0.51 (0.19-0.79)  | 85.2        | —                                | —                |
| Hips                                                 | —                                    | —                | 0.83 (0.65-0.96)  | 92.6        | —                                | —                |
| Back                                                 | —                                    | —                | 0.40 (0.14-0.64)  | 72.7        | —                                | —                |
| Abdomen                                              | —                                    | —                | 0.71 (0.41-0.93)  | 90.7        | —                                | —                |
| Chest                                                | —                                    | —                | 0.54 (0.23-0.80)  | 85.2        | —                                | —                |
| Shoulders                                            | —                                    | —                | 0.53 (0.26-0.74)  | 77.8        | —                                | —                |
| Arms                                                 | —                                    | —                | 0.57 (0.33-0.79)  | 79.6        | —                                | —                |
| Use resistance bands or free weights <sup>g</sup>    |                                      |                  |                   |             |                                  |                  |
| Legs                                                 | —                                    | —                | 0.55 (0.23-0.81)  | 87.0        | —                                | —                |
| Hips                                                 | —                                    | —                | 0.66 (0.45-0.85)  | 83.3        | —                                | —                |
| Back                                                 | —                                    | —                | 0.49 (0.16-0.74)  | 81.5        | —                                | —                |
| Abdomen                                              | —                                    | —                | 0.44 (0.19-0.67)  | 72.2        | —                                | —                |
| Chest                                                | —                                    | —                | 0.33 (0.02-0.60)  | 75.9        | —                                | —                |
| Shoulders                                            | —                                    | —                | 0.84 (0.55-1.00)  | 96.3        | —                                | —                |
| Arms                                                 | —                                    | —                | 0.63 (0.22-0.92)  | 92.6        | —                                | —                |
| Holistic exercises <sup>h</sup>                      |                                      |                  |                   |             |                                  |                  |

|           |   |   |                  |      |   |   |
|-----------|---|---|------------------|------|---|---|
| Legs      | — | — | 0.58 (0.34-0.79) | 79.6 | — | — |
| Hips      | — | — | 0.61 (0.38-0.81) | 81.5 | — | — |
| Back      | — | — | 0.74 (0.50-0.91) | 88.9 | — | — |
| Abdomen   | — | — | 0.66 (0.45-0.85) | 83.3 | — | — |
| Chest     | — | — | 0.69 (0.44-0.88) | 87.0 | — | — |
| Shoulders | — | — | 0.57 (0.34-0.78) | 81.5 | — | — |
| Arms      | — | — | 0.76 (0.53-0.94) | 90.7 | — | — |

<sup>a</sup>Test and retest of MSEQ was conducted a maximum of 14 days apart.

<sup>b</sup>To assess the concurrent validity, respondents completed the MSE 7-day log for 7 consecutive days a maximum of 14 days after the first administration.

<sup>c</sup>To assess level of intensity, using the previously validated OMNI-Resistance Exercise Scale (Robertson et al., 2003), respondents was asked to report for each type of muscle-strengthening exercise “on a scale of 0-10 please indicate how hard you feel you exercise when you are doing ... with 0 representing “extremely easy” and 10 representing “extremely hard”.

<sup>d</sup>To assess muscle groups used, respondents were asked when they undertake muscle-strengthening exercise, do they do exercise that target the following muscle groups legs, hips, back, abdomen, chest, shoulders, and arms.

<sup>e</sup>Weight machines defined as using weight machines such as leg press, chest press, lat pulldown.

<sup>f</sup>Body weight exercises defined as doing push-ups, sit-ups.

<sup>g</sup>Resistance exercises defined as using resistance bands or free weights like dumbbells.

<sup>h</sup>Holistic exercises defined as doing Yoga, Tai-Chi and Pilates.

— results not applicable for this variable.
